# Supplementary material for: Fabrication of Polytetrafluoroethylene Coated Micron Aluminium with Enhanced Oxidation
Source: MDPI journal article supplement (doi:10.3390/ma13153384), 2020-07-30
Supplement: s1 [file s1]

Article

# Fabrication of Polytetrafluoroethylene Coated Micron Aluminium with Enhanced Oxidation

Benbo Zhao <sup>1</sup>, Shixiong Sun <sup>1</sup>, Yunjun Luo <sup>2,3,\*</sup> and Yuan Cheng <sup>1,\*</sup>

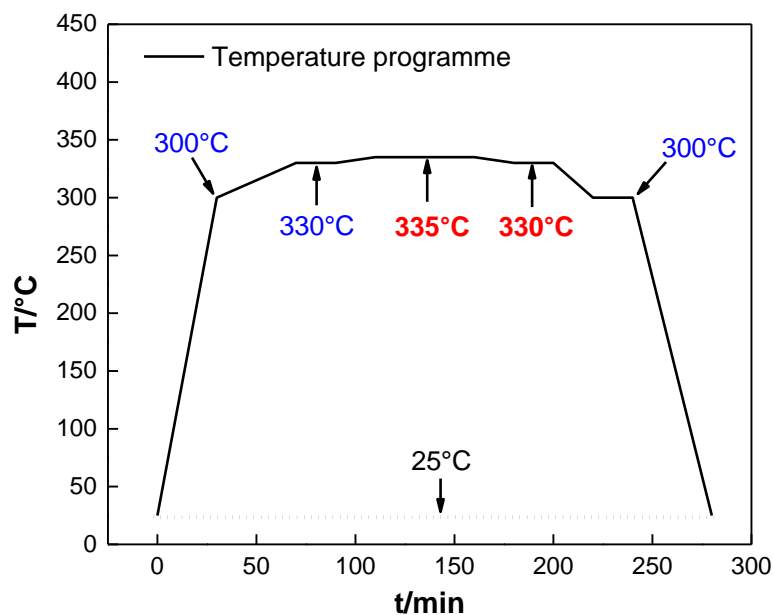

**Figure S1.** The curve of programed temperature in the heat treatment of Al/PTFE.

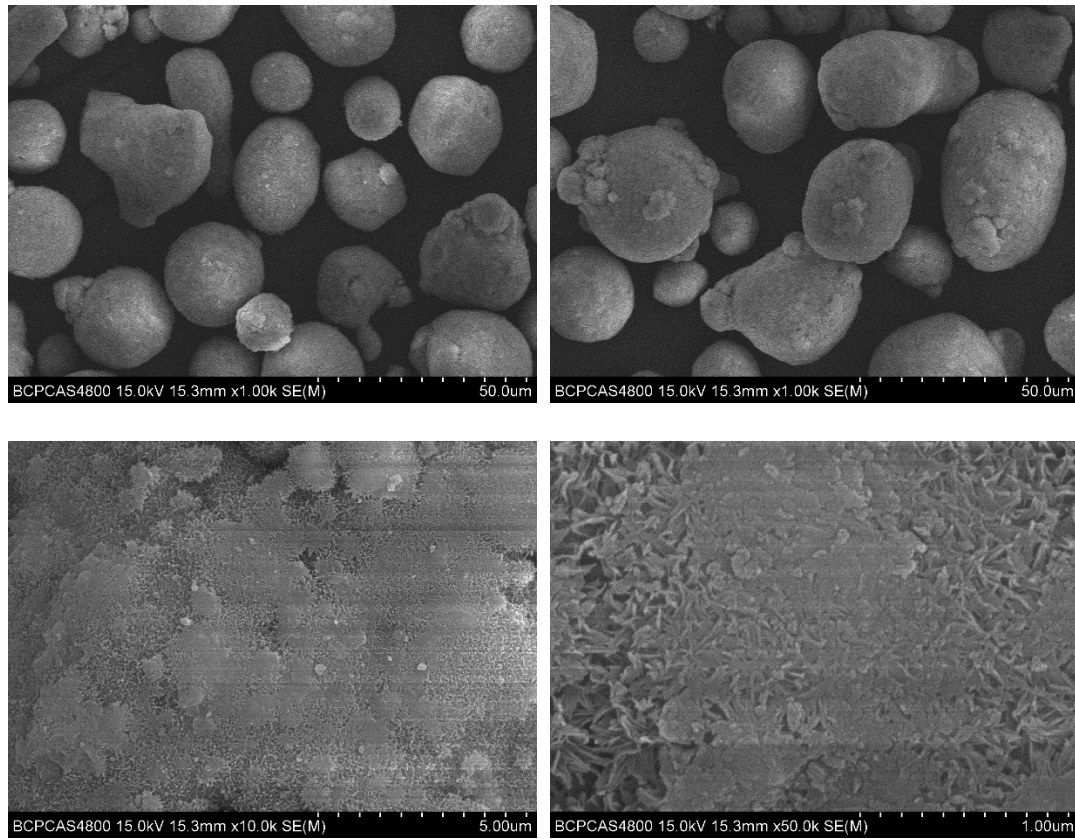

**Figure S2.** SEM images of core-shell structure Al/PTFE composite materials.

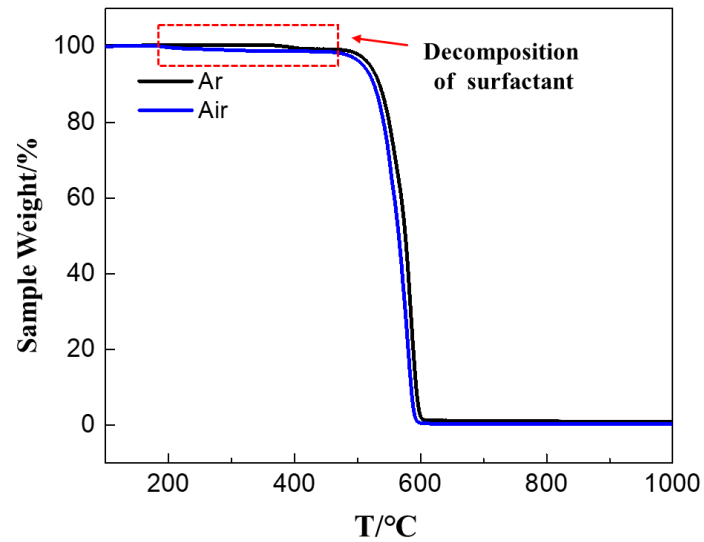

(a) TGA

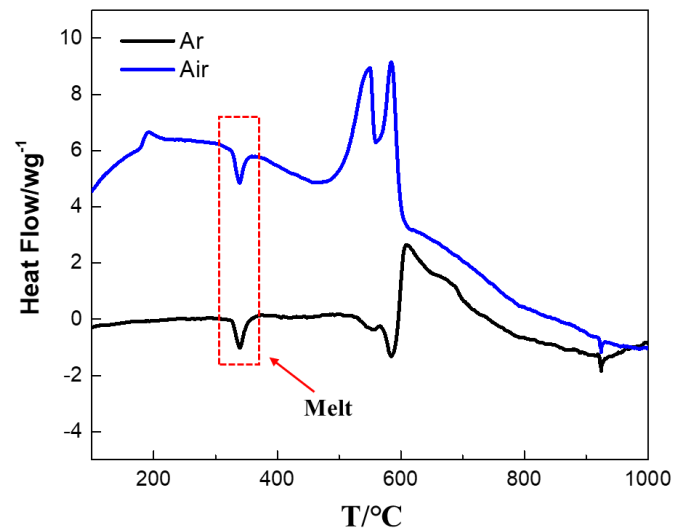

(b) DSC

**Figure S3.** TGA (a) and DSC (b) curve of PTFE nano particles in aqueous solution.**Table S1.** Parameters of TGA/DSC curves of Al and Al/PTFE.

| Sample  | Atmosphere     | Convert Ratio/% | Reaction Heat/(kJ·g <sup>-1</sup> ) |
|---------|----------------|-----------------|-------------------------------------|
| Al      | N <sub>2</sub> | 4.83            | 2.19                                |
| Al      | O <sub>2</sub> | 12.6            | 3.04                                |
| Al      | Air            | 10.5            | 2.43                                |
| Al/PTFE | N <sub>2</sub> | 6.61            | 4.39                                |
| Al/PTFE | O <sub>2</sub> | 37.1            | 10.4                                |
| Al/PTFE | Air            | 29.4            | 8.02                                |

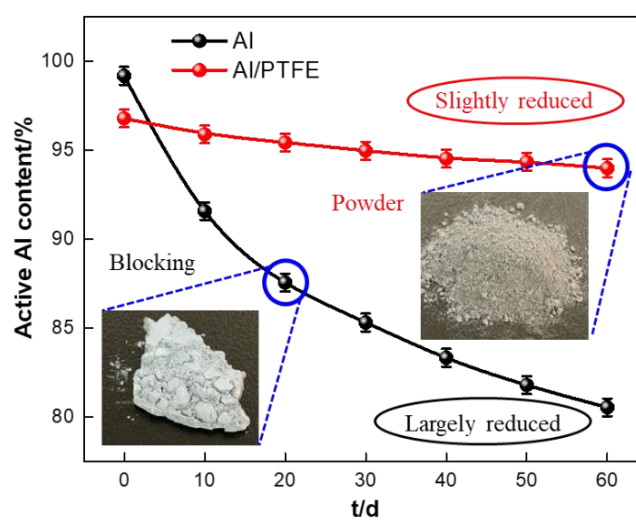

**Figure S4.** The active Al content in pure Al and Al/PTFE powders during aging.
